# Supplementary material for: Facile synthesis of non-ionic dimeric molecular resonance imaging contrast agent: its relaxation and luminescence studies
Source: Royal Society of Chemistry journal article supplement (doi:10.1039/c0dt01370f), 2011-01-01
Supplement: c0dt01370f.pdf [file c0dt01370f.pdf]

ELECTRONIC SUPPLEMENTARY DATA

for

**Facile synthesis of non-ionic dimeric molecular resonance  
imaging contrast agent: Its relaxation and luminescence studies**

**Jyoti Tanwar,<sup>ab</sup> Anupama Datta,<sup>\*a</sup> Anjani K. Tiwari,<sup>a</sup> Shubhra Chaturvedi,<sup>a</sup> Himanshu Ojha,<sup>a</sup>  
Michele Allard,<sup>c</sup> N. K. Chaudary,<sup>a</sup> M. Thirumal<sup>b</sup> and Anil K. Mishra<sup>\*a</sup>**

<sup>a</sup> *Institute of Nuclear Medicine and Allied Sciences, Brig S K. Mazumdar Road, Delhi-54, India.*

<sup>b</sup> *Department of Chemistry, University of Delhi, Delhi-54, India.*

<sup>c</sup> *Université de Bordeaux et EPHE, Bordeaux, France.*

Spectroscopic Data :

1. Figure S1 : <sup>1</sup>H NMR spectrum of **t-Bu-DO3A**.
2. Figure S2: <sup>13</sup>C NMR spectrum of **t-Bu-DO3A**.
3. Figure S3: **ESI-MS** spectrum of **t-Bu-DO3A**.
4. Figure S4: <sup>1</sup>H NMR spectrum of **2**.
5. Figure S5: <sup>13</sup>C NMR spectrum of **2**.
6. Figure S6: **ESI-MS** spectrum of **2**.
7. Figure S7: <sup>1</sup>H NMR spectrum of **DO3A-AME-DO3A**.
8. Figure S8: <sup>13</sup>C NMR spectrum of **DO3A-AME-DO3A**.
9. Figure S9: **ESI-MS** spectrum of **DO3A-AME-DO3A**.
10. Figure S10: **ESI-MS** spectrum of **Gd<sub>2</sub>-DO3A-AME-DO3A**.
11. Figure S11: **ESI-MS** spectrum of **Eu<sub>2</sub>-DO3A-AME-DO3A**.

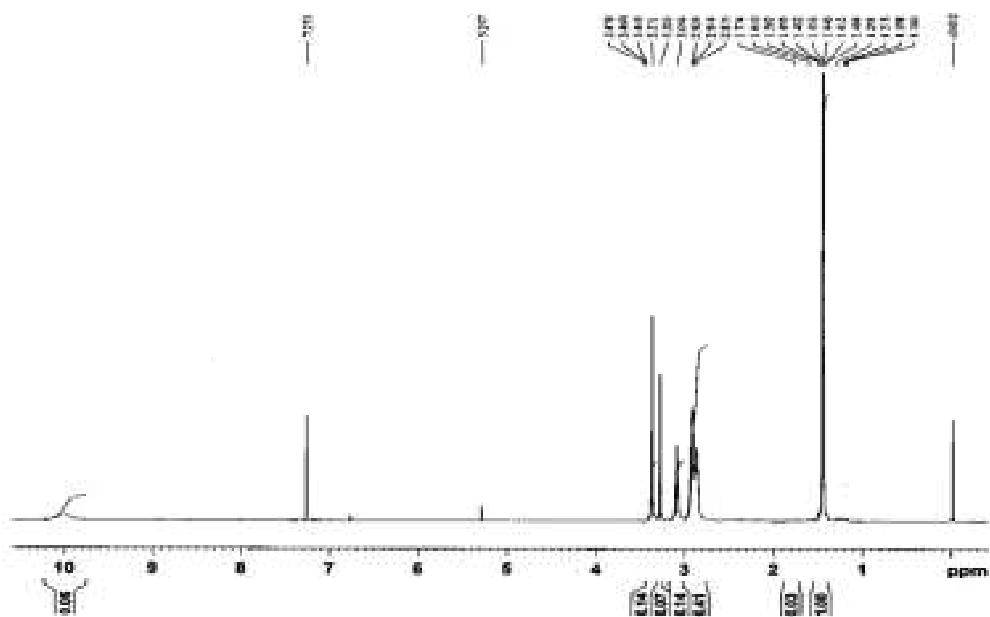

**Fig. S1.**  $^1\text{H}$  NMR spectrum of t-Bu-DO3A.

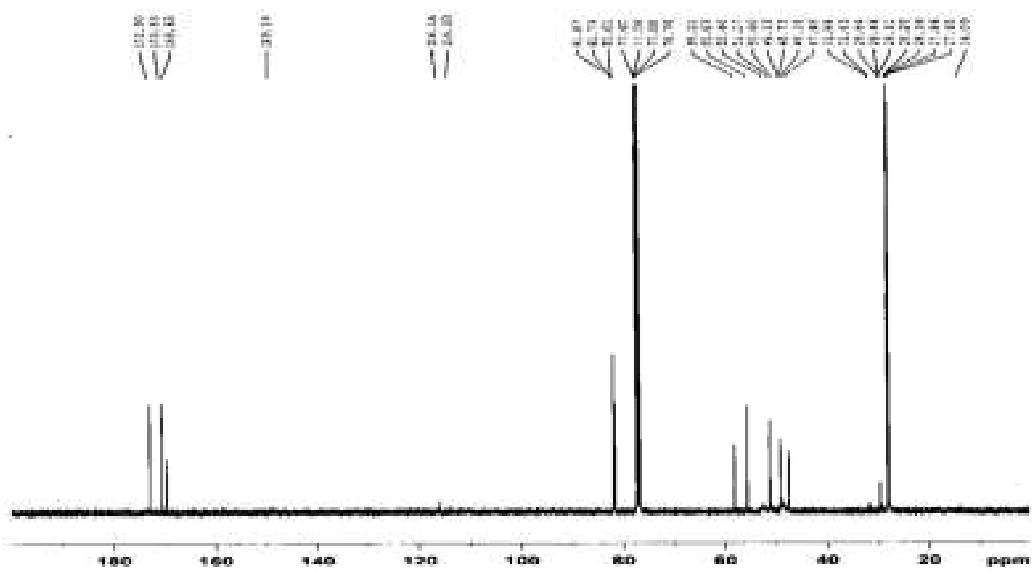

**Fig. S2.**  $^{13}\text{C}$  NMR spectrum of t-Bu-DO3A.

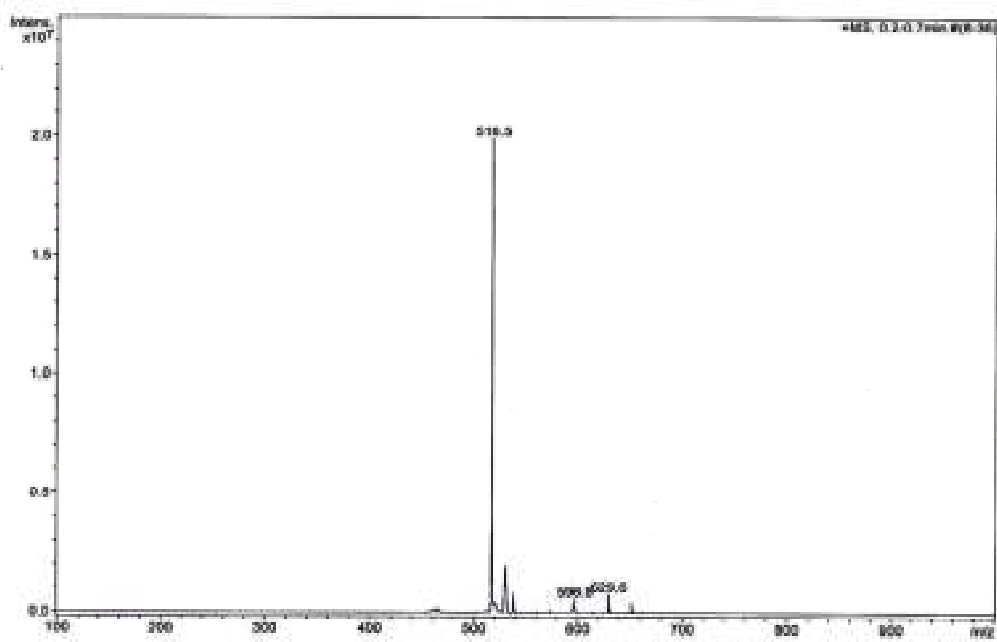

**Fig. S3.** ESI-MS spectrum of t-Bu-DO3A.

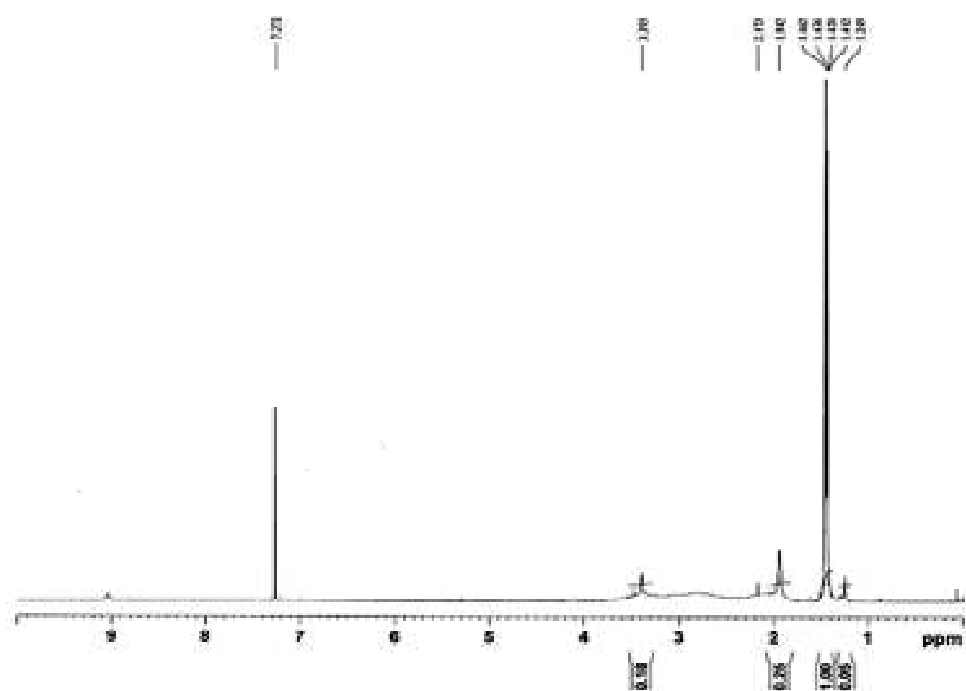

**Fig. S4.** <sup>1</sup>H NMR spectrum of compound 2.

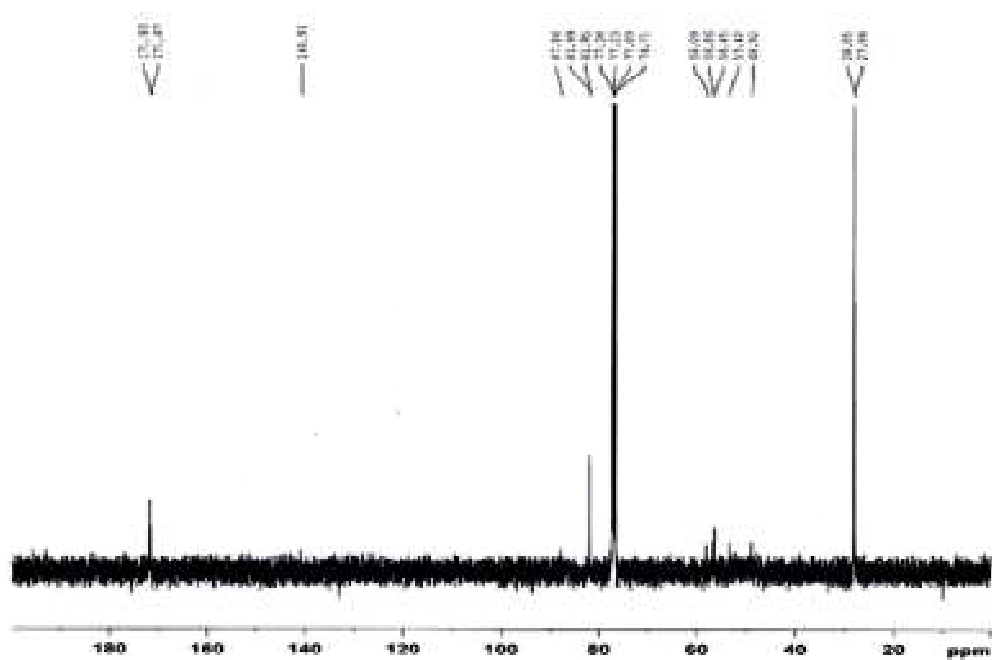

Fig. S5.  $^{13}\text{C}$  NMR spectrum of compound 2.

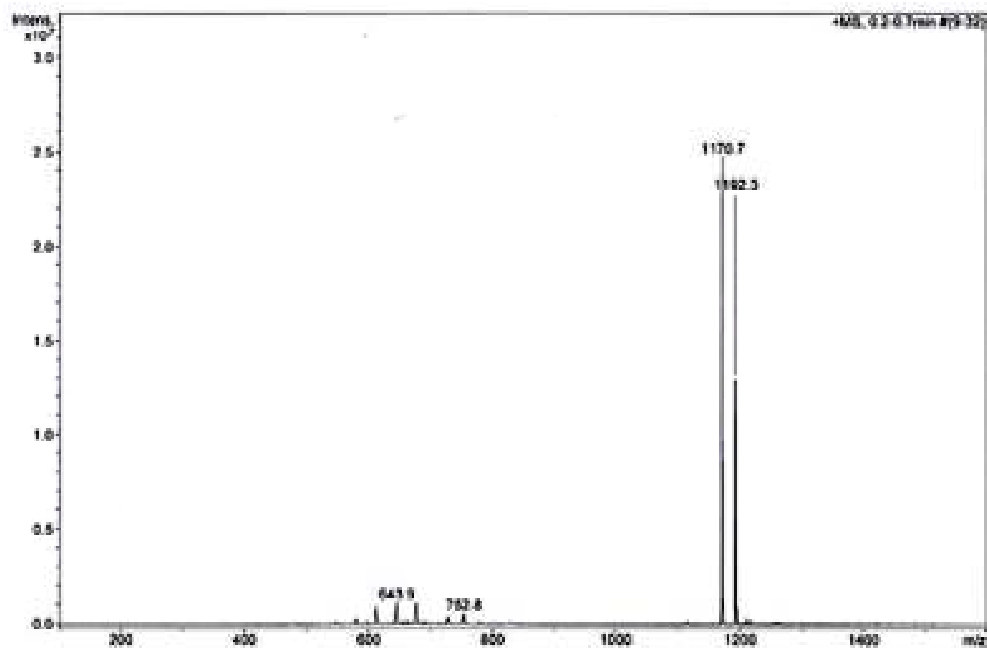

Fig. S6. Mass spectrum of compound 2.



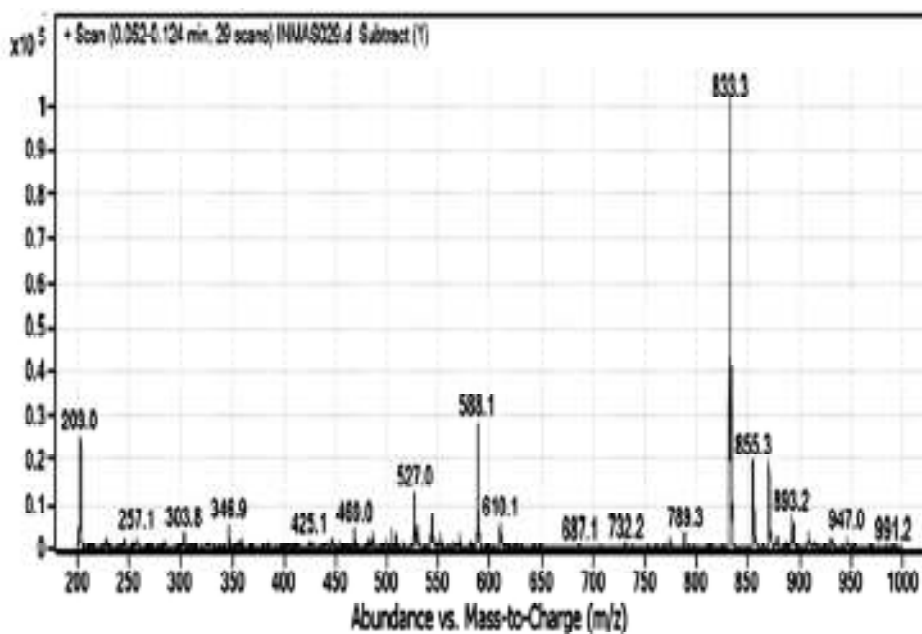

**Fig. S9.** Mass spectrum of DO3A-AME-DO3A.

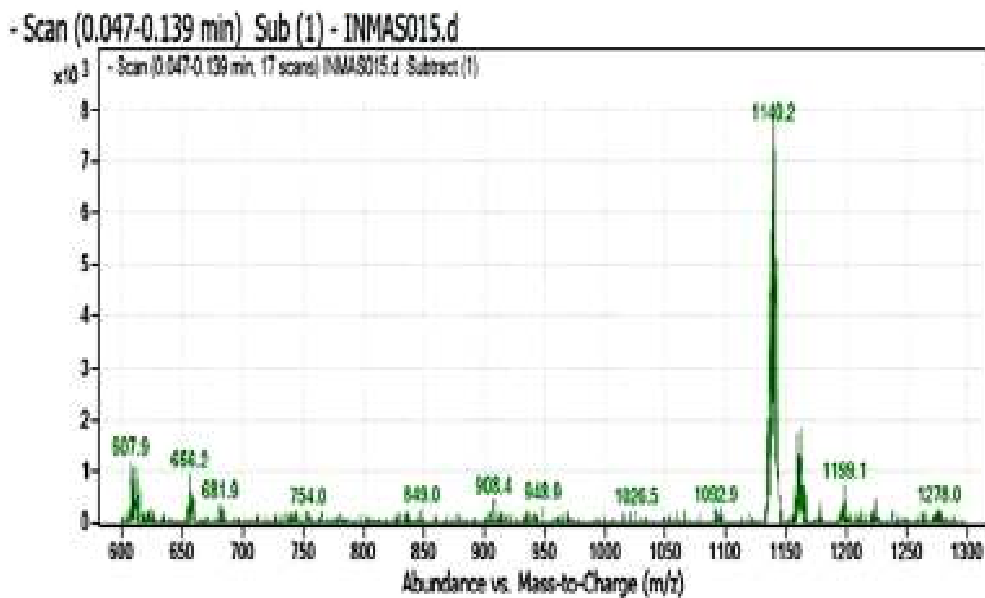

**Fig. S10.** ESI-MS spectrum of Gd<sub>3</sub>-DO3A-AME-DO3A.

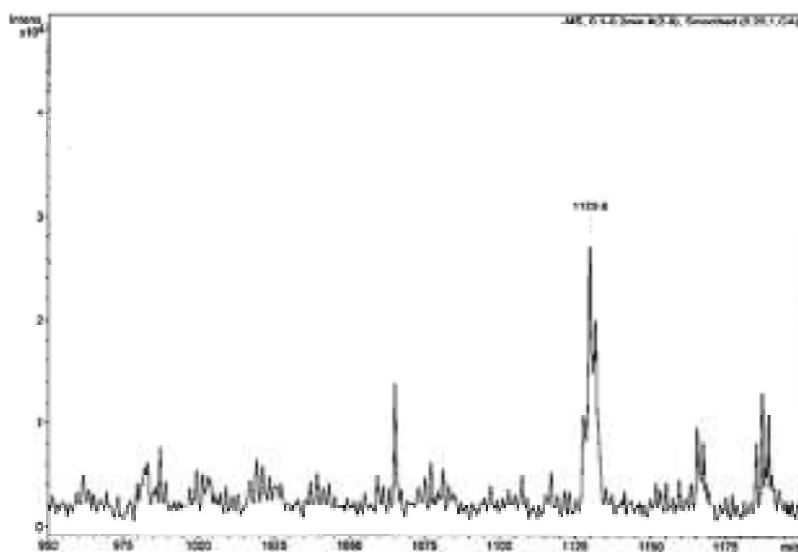

**Fig. S11.** ESI-MS spectrum of  $\text{Eu}_2\text{-DO3A-AME-DO3A}$ .
